# Supplementary material
Source: publisher site journal article supplement (https://www.spandidos-publications.com/2636/downloadSupplementary)
Supplement: Supplementary file 1 [file downloadSupplementary]

## Sheet: Table S12 Down_KEGG_pathway_ide
Table SXII. Down_KEGG_pathway_ide.
#Term	Database	ID	Input number	Background number	P-value	Corrected P-value	Input	Hyperlink
Cell adhesion molecules (CAMs)	KEGG PATHWAY	hsa04514	7	145	0.000762163	0.126519	HLA-DOB|JAM2|CD22|VCAN|SELPLG|MAG|HLA-DMA	http://www.genome.jp/kegg-bin/show_pathway?hsa04514/hsa:58494%09red/hsa:3108%09red/hsa:6404%09red/hsa:3112%09red/hsa:933%09red/hsa:4099%09red/hsa:1462%09red
Staphylococcus aureus infection	KEGG PATHWAY	hsa05150	4	57	0.00289235	0.240065	HLA-DMA|SELPLG|HLA-DOB|C4A	http://www.genome.jp/kegg-bin/show_pathway?hsa05150/hsa:6404%09red/hsa:3112%09red/hsa:720%09red/hsa:3108%09red
Hematopoietic cell lineage	KEGG PATHWAY	hsa04640	4	88	0.0133906	0.570686	CD22|CD7|CSF2|KIT	http://www.genome.jp/kegg-bin/show_pathway?hsa04640/hsa:3815%09red/hsa:933%09red/hsa:924%09red/hsa:1437%09red
Systemic lupus erythematosus	KEGG PATHWAY	hsa05322	5	136	0.0137515	0.570686	HIST1H3J|HIST1H4J|C4A|HLA-DOB|HLA-DMA	http://www.genome.jp/kegg-bin/show_pathway?hsa05322/hsa:8363%09red/hsa:3112%09red/hsa:720%09red/hsa:8356%09red/hsa:3108%09red
Cytokine-cytokine receptor interaction	KEGG PATHWAY	hsa04060	7	265	0.0205283	0.592445	PDGFC|TNFRSF1B|GH1|AMHR2|CSF2|KIT|TNFRSF9	http://www.genome.jp/kegg-bin/show_pathway?hsa04060/hsa:3604%09red/hsa:1437%09red/hsa:3815%09red/hsa:2688%09red/hsa:7133%09red/hsa:56034%09red/hsa:269%09red
Arachidonic acid metabolism	KEGG PATHWAY	hsa00590	3	62	0.0269227	0.592445	ALOX5|ALOX12B|GGT5	http://www.genome.jp/kegg-bin/show_pathway?hsa00590/hsa:2687%09red/hsa:242%09red/hsa:240%09red
Inflammatory bowel disease (IBD)	KEGG PATHWAY	hsa05321	3	66	0.0316272	0.592445	HLA-DMA|HLA-DOB|NOD2	http://www.genome.jp/kegg-bin/show_pathway?hsa05321/hsa:64127%09red/hsa:3112%09red/hsa:3108%09red
Fc epsilon RI signaling pathway	KEGG PATHWAY	hsa04664	3	68	0.0341311	0.592445	PLCG2|INPP5D|CSF2	http://www.genome.jp/kegg-bin/show_pathway?hsa04664/hsa:5336%09red/hsa:3635%09red/hsa:1437%09red
B cell receptor signaling pathway	KEGG PATHWAY	hsa04662	3	73	0.0408281	0.592445	PLCG2|INPP5D|CD22	http://www.genome.jp/kegg-bin/show_pathway?hsa04662/hsa:5336%09red/hsa:3635%09red/hsa:933%09red
Asthma	KEGG PATHWAY	hsa05310	2	32	0.0439441	0.592445	HLA-DOB|HLA-DMA	http://www.genome.jp/kegg-bin/show_pathway?hsa05310/hsa:3112%09red/hsa:3108%09red
Taste transduction	KEGG PATHWAY	hsa04742	3	83	0.0560513	0.592445	CACNA1A|HCN4|TAS2R13	http://www.genome.jp/kegg-bin/show_pathway?hsa04742/hsa:773%09red/hsa:10021%09red/hsa:50838%09red
Allograft rejection	KEGG PATHWAY	hsa05330	2	39	0.0626636	0.592445	HLA-DOB|HLA-DMA	http://www.genome.jp/kegg-bin/show_pathway?hsa05330/hsa:3112%09red/hsa:3108%09red
Phospholipase D signaling pathway	KEGG PATHWAY	hsa04072	4	144	0.0639531	0.592445	PLCG2|PDGFC|CYTH4|KIT	http://www.genome.jp/kegg-bin/show_pathway?hsa04072/hsa:56034%09red/hsa:5336%09red/hsa:3815%09red/hsa:27128%09red
PI3K-Akt signaling pathway	KEGG PATHWAY	hsa04151	7	341	0.0653841	0.592445	PCK1|GH1|KIT|ITGA10|PDGFC|COL6A3|MYB	http://www.genome.jp/kegg-bin/show_pathway?hsa04151/hsa:8515%09red/hsa:1293%09red/hsa:3815%09red/hsa:2688%09red/hsa:5105%09red/hsa:4602%09red/hsa:56034%09red
Glycine, serine and threonine metabolism	KEGG PATHWAY	hsa00260	2	40	0.0655258	0.592445	CBS|SDSL	http://www.genome.jp/kegg-bin/show_pathway?hsa00260/hsa:875%09red/hsa:113675%09red
Nicotine addiction	KEGG PATHWAY	hsa05033	2	40	0.0655258	0.592445	CACNA1A|SLC17A7	http://www.genome.jp/kegg-bin/show_pathway?hsa05033/hsa:773%09red/hsa:57030%09red
Salivary secretion	KEGG PATHWAY	hsa04970	3	89	0.0663094	0.592445	CST1|LYZ|PRH1	http://www.genome.jp/kegg-bin/show_pathway?hsa04970/hsa:4069%09red/hsa:1469%09red/hsa:5554%09red
Rheumatoid arthritis	KEGG PATHWAY	hsa05323	3	91	0.0699082	0.592445	CSF2|HLA-DOB|HLA-DMA	http://www.genome.jp/kegg-bin/show_pathway?hsa05323/hsa:3112%09red/hsa:3108%09red/hsa:1437%09red
Graft-versus-host disease	KEGG PATHWAY	hsa05332	2	42	0.0713789	0.592445	HLA-DOB|HLA-DMA	http://www.genome.jp/kegg-bin/show_pathway?hsa05332/hsa:3112%09red/hsa:3108%09red
Porphyrin and chlorophyll metabolism	KEGG PATHWAY	hsa00860	2	42	0.0713789	0.592445	CP|UGT1A7	http://www.genome.jp/kegg-bin/show_pathway?hsa00860/hsa:1356%09red/hsa:54577%09red
Type I diabetes mellitus	KEGG PATHWAY	hsa04940	2	44	0.0773956	0.603134	HLA-DOB|HLA-DMA	http://www.genome.jp/kegg-bin/show_pathway?hsa04940/hsa:3112%09red/hsa:3108%09red
Cysteine and methionine metabolism	KEGG PATHWAY	hsa00270	2	45	0.0804624	0.603134	CBS|SDSL	http://www.genome.jp/kegg-bin/show_pathway?hsa00270/hsa:875%09red/hsa:113675%09red
Drug metabolism - other enzymes	KEGG PATHWAY	hsa00983	2	46	0.0835667	0.603134	UPB1|UGT1A7	http://www.genome.jp/kegg-bin/show_pathway?hsa00983/hsa:51733%09red/hsa:54577%09red
Intestinal immune network for IgA production	KEGG PATHWAY	hsa04672	2	49	0.0930938	0.643898	HLA-DOB|HLA-DMA	http://www.genome.jp/kegg-bin/show_pathway?hsa04672/hsa:3112%09red/hsa:3108%09red
TNF signaling pathway	KEGG PATHWAY	hsa04668	3	110	0.108219	0.655859	TNFRSF1B|CSF2|NOD2	http://www.genome.jp/kegg-bin/show_pathway?hsa04668/hsa:64127%09red/hsa:7133%09red/hsa:1437%09red
Taurine and hypotaurine metabolism	KEGG PATHWAY	hsa00430	1	11	0.109559	0.655859	GGT5	http://www.genome.jp/kegg-bin/show_pathway?hsa00430/hsa:2687%09red
Autoimmune thyroid disease	KEGG PATHWAY	hsa05320	2	54	0.109623	0.655859	HLA-DOB|HLA-DMA	http://www.genome.jp/kegg-bin/show_pathway?hsa05320/hsa:3112%09red/hsa:3108%09red
Serotonergic synapse	KEGG PATHWAY	hsa04726	3	112	0.112651	0.655859	CACNA1A|ALOX5|ALOX12B	http://www.genome.jp/kegg-bin/show_pathway?hsa04726/hsa:773%09red/hsa:242%09red/hsa:240%09red
Transcriptional misregulation in cancer	KEGG PATHWAY	hsa05202	4	180	0.119685	0.655859	RUNX2|HIST1H3J|ETV7|CSF2	http://www.genome.jp/kegg-bin/show_pathway?hsa05202/hsa:51513%09red/hsa:860%09red/hsa:8356%09red/hsa:1437%09red
NOD-like receptor signaling pathway	KEGG PATHWAY	hsa04621	2	57	0.119888	0.655859	CARD6|NOD2	http://www.genome.jp/kegg-bin/show_pathway?hsa04621/hsa:64127%09red/hsa:84674%09red
Steroid hormone biosynthesis	KEGG PATHWAY	hsa00140	2	58	0.123361	0.655859	UGT1A7|HSD11B2	http://www.genome.jp/kegg-bin/show_pathway?hsa00140/hsa:3291%09red/hsa:54577%09red
Toxoplasmosis	KEGG PATHWAY	hsa05145	3	119	0.128696	0.655859	ALOX5|HLA-DOB|HLA-DMA	http://www.genome.jp/kegg-bin/show_pathway?hsa05145/hsa:3112%09red/hsa:3108%09red/hsa:240%09red
Viral myocarditis	KEGG PATHWAY	hsa05416	2	60	0.130382	0.655859	HLA-DOB|HLA-DMA	http://www.genome.jp/kegg-bin/show_pathway?hsa05416/hsa:3112%09red/hsa:3108%09red
HTLV-I infection	KEGG PATHWAY	hsa05166	5	259	0.134776	0.658025	WNT3A|MYB|CSF2|HLA-DOB|HLA-DMA	http://www.genome.jp/kegg-bin/show_pathway?hsa05166/hsa:4602%09red/hsa:3112%09red/hsa:1437%09red/hsa:3108%09red/hsa:89780%09red
Synaptic vesicle cycle	KEGG PATHWAY	hsa04721	2	63	0.141081	0.669127	CACNA1A|SLC17A7	http://www.genome.jp/kegg-bin/show_pathway?hsa04721/hsa:773%09red/hsa:57030%09red
Epithelial cell signaling in Helicobacter pylori infection	KEGG PATHWAY	hsa05120	2	68	0.15931	0.715784	PLCG2|JAM2	http://www.genome.jp/kegg-bin/show_pathway?hsa05120/hsa:5336%09red/hsa:58494%09red
Adipocytokine signaling pathway	KEGG PATHWAY	hsa04920	2	70	0.166722	0.715784	PCK1|TNFRSF1B	http://www.genome.jp/kegg-bin/show_pathway?hsa04920/hsa:7133%09red/hsa:5105%09red
Inositol phosphate metabolism	KEGG PATHWAY	hsa00562	2	71	0.170451	0.715784	PLCG2|INPP5D	http://www.genome.jp/kegg-bin/show_pathway?hsa00562/hsa:5336%09red/hsa:3635%09red
Pantothenate and CoA biosynthesis	KEGG PATHWAY	hsa00770	1	18	0.173021	0.715784	UPB1	http://www.genome.jp/kegg-bin/show_pathway?hsa00770/hsa:51733%09red
Tight junction	KEGG PATHWAY	hsa04530	3	139	0.178486	0.715784	MYH8|RAB3B|JAM2	http://www.genome.jp/kegg-bin/show_pathway?hsa04530/hsa:4626%09red/hsa:58494%09red/hsa:5865%09red
Glycosaminoglycan degradation	KEGG PATHWAY	hsa00531	1	19	0.181715	0.715784	IDUA	http://www.genome.jp/kegg-bin/show_pathway?hsa00531/hsa:3425%09red
Leishmaniasis	KEGG PATHWAY	hsa05140	2	74	0.181721	0.715784	HLA-DOB|HLA-DMA	http://www.genome.jp/kegg-bin/show_pathway?hsa05140/hsa:3112%09red/hsa:3108%09red
Biosynthesis of amino acids	KEGG PATHWAY	hsa01230	2	75	0.185503	0.715784	CBS|SDSL	http://www.genome.jp/kegg-bin/show_pathway?hsa01230/hsa:875%09red/hsa:113675%09red
Steroid biosynthesis	KEGG PATHWAY	hsa00100	1	20	0.190318	0.715784	CYP24A1	http://www.genome.jp/kegg-bin/show_pathway?hsa00100/hsa:1591%09red
Antigen processing and presentation	KEGG PATHWAY	hsa04612	2	78	0.196915	0.715784	HLA-DOB|HLA-DMA	http://www.genome.jp/kegg-bin/show_pathway?hsa04612/hsa:3112%09red/hsa:3108%09red
Complement and coagulation cascades	KEGG PATHWAY	hsa04610	2	79	0.20074	0.715784	A2M|C4A	http://www.genome.jp/kegg-bin/show_pathway?hsa04610/hsa:2%09red/hsa:720%09red
EGFR tyrosine kinase inhibitor resistance	KEGG PATHWAY	hsa01521	2	81	0.208415	0.715784	PLCG2|PDGFC	http://www.genome.jp/kegg-bin/show_pathway?hsa01521/hsa:5336%09red/hsa:56034%09red
ECM-receptor interaction	KEGG PATHWAY	hsa04512	2	82	0.212265	0.715784	COL6A3|ITGA10	http://www.genome.jp/kegg-bin/show_pathway?hsa04512/hsa:8515%09red/hsa:1293%09red
Protein export	KEGG PATHWAY	hsa03060	1	23	0.215598	0.715784	IMMP1L	http://www.genome.jp/kegg-bin/show_pathway?hsa03060/hsa:196294%09red
Proximal tubule bicarbonate reclamation	KEGG PATHWAY	hsa04964	1	23	0.215598	0.715784	PCK1	http://www.genome.jp/kegg-bin/show_pathway?hsa04964/hsa:5105%09red
Protein digestion and absorption	KEGG PATHWAY	hsa04974	2	90	0.24328	0.727919	COL6A3|PGA5	http://www.genome.jp/kegg-bin/show_pathway?hsa04974/hsa:5222%09red/hsa:1293%09red
Morphine addiction	KEGG PATHWAY	hsa05032	2	91	0.247176	0.727919	CACNA1A|PDE4B	http://www.genome.jp/kegg-bin/show_pathway?hsa05032/hsa:773%09red/hsa:5142%09red
Ascorbate and aldarate metabolism	KEGG PATHWAY	hsa00053	1	27	0.248096	0.727919	UGT1A7	http://www.genome.jp/kegg-bin/show_pathway?hsa00053/hsa:54577%09red
Phototransduction	KEGG PATHWAY	hsa04744	1	27	0.248096	0.727919	GRK1	http://www.genome.jp/kegg-bin/show_pathway?hsa04744/hsa:6011%09red
Fc gamma R-mediated phagocytosis	KEGG PATHWAY	hsa04666	2	93	0.254975	0.727919	PLCG2|INPP5D	http://www.genome.jp/kegg-bin/show_pathway?hsa04666/hsa:5336%09red/hsa:3635%09red
Dorso-ventral axis formation	KEGG PATHWAY	hsa04320	1	28	0.256011	0.727919	ETV7	http://www.genome.jp/kegg-bin/show_pathway?hsa04320/hsa:51513%09red
Citrate cycle (TCA cycle)	KEGG PATHWAY	hsa00020	1	30	0.271594	0.727919	PCK1	http://www.genome.jp/kegg-bin/show_pathway?hsa00020/hsa:5105%09red
Phosphatidylinositol signaling system	KEGG PATHWAY	hsa04070	2	98	0.274494	0.727919	PLCG2|INPP5D	http://www.genome.jp/kegg-bin/show_pathway?hsa04070/hsa:5336%09red/hsa:3635%09red
Mucin type O-Glycan biosynthesis	KEGG PATHWAY	hsa00512	1	31	0.279265	0.727919	GCNT4	http://www.genome.jp/kegg-bin/show_pathway?hsa00512/hsa:51301%09red
beta-Alanine metabolism	KEGG PATHWAY	hsa00410	1	31	0.279265	0.727919	UPB1	http://www.genome.jp/kegg-bin/show_pathway?hsa00410/hsa:51733%09red
Influenza A	KEGG PATHWAY	hsa05164	3	176	0.280799	0.727919	TMPRSS4|HLA-DOB|HLA-DMA	http://www.genome.jp/kegg-bin/show_pathway?hsa05164/hsa:3112%09red/hsa:3108%09red/hsa:56649%09red
Melanogenesis	KEGG PATHWAY	hsa04916	2	100	0.282301	0.727919	WNT3A|KIT	http://www.genome.jp/kegg-bin/show_pathway?hsa04916/hsa:3815%09red/hsa:89780%09red
Choline metabolism in cancer	KEGG PATHWAY	hsa05231	2	101	0.286202	0.727919	SLC44A3|PDGFC	http://www.genome.jp/kegg-bin/show_pathway?hsa05231/hsa:126969%09red/hsa:56034%09red
Retrograde endocannabinoid signaling	KEGG PATHWAY	hsa04723	2	101	0.286202	0.727919	CACNA1A|SLC17A7	http://www.genome.jp/kegg-bin/show_pathway?hsa04723/hsa:773%09red/hsa:57030%09red
Tuberculosis	KEGG PATHWAY	hsa05152	3	179	0.289414	0.727919	HLA-DMA|HLA-DOB|NOD2	http://www.genome.jp/kegg-bin/show_pathway?hsa05152/hsa:64127%09red/hsa:3112%09red/hsa:3108%09red
Alcoholism	KEGG PATHWAY	hsa05034	3	179	0.289414	0.727919	SLC6A3|HIST1H4J|HIST1H3J	http://www.genome.jp/kegg-bin/show_pathway?hsa05034/hsa:8356%09red/hsa:8363%09red/hsa:6531%09red
Pyrimidine metabolism	KEGG PATHWAY	hsa00240	2	105	0.301787	0.74771	UPB1|ENTPD8	http://www.genome.jp/kegg-bin/show_pathway?hsa00240/hsa:51733%09red/hsa:377841%09red
African trypanosomiasis	KEGG PATHWAY	hsa05143	1	35	0.309159	0.754712	HBA2	http://www.genome.jp/kegg-bin/show_pathway?hsa05143/hsa:3040%09red
Pentose and glucuronate interconversions	KEGG PATHWAY	hsa00040	1	36	0.316439	0.755281	UGT1A7	http://www.genome.jp/kegg-bin/show_pathway?hsa00040/hsa:54577%09red
Cholinergic synapse	KEGG PATHWAY	hsa04725	2	111	0.325058	0.755281	CACNA1A|KCNJ4	http://www.genome.jp/kegg-bin/show_pathway?hsa04725/hsa:773%09red/hsa:3761%09red
Huntington's disease	KEGG PATHWAY	hsa05016	3	193	0.329832	0.755281	DNAH2|NDUFA7|DNAH10	http://www.genome.jp/kegg-bin/show_pathway?hsa05016/hsa:4701%09red/hsa:146754%09red/hsa:196385%09red
Glutamatergic synapse	KEGG PATHWAY	hsa04724	2	114	0.336627	0.755281	CACNA1A|SLC17A7	http://www.genome.jp/kegg-bin/show_pathway?hsa04724/hsa:773%09red/hsa:57030%09red
Aldosterone-regulated sodium reabsorption	KEGG PATHWAY	hsa04960	1	39	0.337829	0.755281	HSD11B2	http://www.genome.jp/kegg-bin/show_pathway?hsa04960/hsa:3291%09red
Pyruvate metabolism	KEGG PATHWAY	hsa00620	1	40	0.344811	0.755281	PCK1	http://www.genome.jp/kegg-bin/show_pathway?hsa00620/hsa:5105%09red
cAMP signaling pathway	KEGG PATHWAY	hsa04024	3	199	0.347185	0.755281	PDE4B|HCAR1|HCN4	http://www.genome.jp/kegg-bin/show_pathway?hsa04024/hsa:27198%09red/hsa:10021%09red/hsa:5142%09red
Leukocyte transendothelial migration	KEGG PATHWAY	hsa04670	2	118	0.351963	0.755281	PLCG2|JAM2	http://www.genome.jp/kegg-bin/show_pathway?hsa04670/hsa:5336%09red/hsa:58494%09red
Focal adhesion	KEGG PATHWAY	hsa04510	3	203	0.358737	0.755281	COL6A3|PDGFC|ITGA10	http://www.genome.jp/kegg-bin/show_pathway?hsa04510/hsa:8515%09red/hsa:56034%09red/hsa:1293%09red
Lysosome	KEGG PATHWAY	hsa04142	2	123	0.370968	0.755281	LAPTM5|IDUA	http://www.genome.jp/kegg-bin/show_pathway?hsa04142/hsa:3425%09red/hsa:7805%09red
Proteasome	KEGG PATHWAY	hsa03050	1	44	0.372021	0.755281	PSMA2	http://www.genome.jp/kegg-bin/show_pathway?hsa03050/hsa:5683%09red
ABC transporters	KEGG PATHWAY	hsa02010	1	45	0.378647	0.755281	ABCG2	http://www.genome.jp/kegg-bin/show_pathway?hsa02010/hsa:9429%09red
MicroRNAs in cancer	KEGG PATHWAY	hsa05206	4	299	0.383795	0.755281	WNT3A|PLCG2|CYP24A1|TP63	http://www.genome.jp/kegg-bin/show_pathway?hsa05206/hsa:5336%09red/hsa:1591%09red/hsa:8626%09red/hsa:89780%09red
Dopaminergic synapse	KEGG PATHWAY	hsa04728	2	130	0.397206	0.755281	SLC6A3|CACNA1A	http://www.genome.jp/kegg-bin/show_pathway?hsa04728/hsa:773%09red/hsa:6531%09red
Type II diabetes mellitus	KEGG PATHWAY	hsa04930	1	48	0.398115	0.755281	CACNA1A	http://www.genome.jp/kegg-bin/show_pathway?hsa04930/hsa:773%09red
Malaria	KEGG PATHWAY	hsa05144	1	49	0.40447	0.755281	HBA2	http://www.genome.jp/kegg-bin/show_pathway?hsa05144/hsa:3040%09red
Cocaine addiction	KEGG PATHWAY	hsa05030	1	49	0.40447	0.755281	SLC6A3	http://www.genome.jp/kegg-bin/show_pathway?hsa05030/hsa:6531%09red
Osteoclast differentiation	KEGG PATHWAY	hsa04380	2	132	0.404615	0.755281	PLCG2|SIRPA	http://www.genome.jp/kegg-bin/show_pathway?hsa04380/hsa:5336%09red/hsa:140885%09red
Ovarian steroidogenesis	KEGG PATHWAY	hsa04913	1	50	0.410758	0.755281	ALOX5	http://www.genome.jp/kegg-bin/show_pathway?hsa04913/hsa:240%09red
FoxO signaling pathway	KEGG PATHWAY	hsa04068	2	134	0.411982	0.755281	CCNB3|PCK1	http://www.genome.jp/kegg-bin/show_pathway?hsa04068/hsa:85417%09red/hsa:5105%09red
Natural killer cell mediated cytotoxicity	KEGG PATHWAY	hsa04650	2	135	0.415649	0.755281	PLCG2|CSF2	http://www.genome.jp/kegg-bin/show_pathway?hsa04650/hsa:5336%09red/hsa:1437%09red
Vibrio cholerae infection	KEGG PATHWAY	hsa05110	1	51	0.416981	0.755281	PLCG2	http://www.genome.jp/kegg-bin/show_pathway?hsa05110/hsa:5336%09red
Amyotrophic lateral sclerosis (ALS)	KEGG PATHWAY	hsa05014	1	51	0.416981	0.755281	TNFRSF1B	http://www.genome.jp/kegg-bin/show_pathway?hsa05014/hsa:7133%09red
Mineral absorption	KEGG PATHWAY	hsa04978	1	52	0.423139	0.755281	STEAP2	http://www.genome.jp/kegg-bin/show_pathway?hsa04978/hsa:261729%09red
Glutathione metabolism	KEGG PATHWAY	hsa00480	1	52	0.423139	0.755281	GGT5	http://www.genome.jp/kegg-bin/show_pathway?hsa00480/hsa:2687%09red
Ras signaling pathway	KEGG PATHWAY	hsa04014	3	228	0.430065	0.759476	PLCG2|PDGFC|KIT	http://www.genome.jp/kegg-bin/show_pathway?hsa04014/hsa:5336%09red/hsa:56034%09red/hsa:3815%09red
Parkinson's disease	KEGG PATHWAY	hsa05012	2	142	0.441	0.759542	SLC6A3|NDUFA7	http://www.genome.jp/kegg-bin/show_pathway?hsa05012/hsa:4701%09red/hsa:6531%09red
Basal cell carcinoma	KEGG PATHWAY	hsa05217	1	55	0.441231	0.759542	WNT3A	http://www.genome.jp/kegg-bin/show_pathway?hsa05217/hsa:89780%09red
Non-small cell lung cancer	KEGG PATHWAY	hsa05223	1	56	0.447136	0.759542	PLCG2	http://www.genome.jp/kegg-bin/show_pathway?hsa05223/hsa:5336%09red
Starch and sucrose metabolism	KEGG PATHWAY	hsa00500	1	57	0.45298	0.759542	UGT1A7	http://www.genome.jp/kegg-bin/show_pathway?hsa00500/hsa:54577%09red
Acute myeloid leukemia	KEGG PATHWAY	hsa05221	1	57	0.45298	0.759542	KIT	http://www.genome.jp/kegg-bin/show_pathway?hsa05221/hsa:3815%09red
Long-term depression	KEGG PATHWAY	hsa04730	1	60	0.470148	0.763395	CACNA1A	http://www.genome.jp/kegg-bin/show_pathway?hsa04730/hsa:773%09red
VEGF signaling pathway	KEGG PATHWAY	hsa04370	1	61	0.475752	0.763395	PLCG2	http://www.genome.jp/kegg-bin/show_pathway?hsa04370/hsa:5336%09red
Phagosome	KEGG PATHWAY	hsa04145	2	155	0.486466	0.763395	HLA-DOB|HLA-DMA	http://www.genome.jp/kegg-bin/show_pathway?hsa04145/hsa:3112%09red/hsa:3108%09red
Jak-STAT signaling pathway	KEGG PATHWAY	hsa04630	2	158	0.496638	0.763395	GH1|CSF2	http://www.genome.jp/kegg-bin/show_pathway?hsa04630/hsa:2688%09red/hsa:1437%09red
Shigellosis	KEGG PATHWAY	hsa05131	1	65	0.497588	0.763395	NOD2	http://www.genome.jp/kegg-bin/show_pathway?hsa05131/hsa:64127%09red
Glioma	KEGG PATHWAY	hsa05214	1	65	0.497588	0.763395	PLCG2	http://www.genome.jp/kegg-bin/show_pathway?hsa05214/hsa:5336%09red
Retinol metabolism	KEGG PATHWAY	hsa00830	1	65	0.497588	0.763395	UGT1A7	http://www.genome.jp/kegg-bin/show_pathway?hsa00830/hsa:54577%09red
Amphetamine addiction	KEGG PATHWAY	hsa05031	1	67	0.508167	0.763395	SLC6A3	http://www.genome.jp/kegg-bin/show_pathway?hsa05031/hsa:6531%09red
Central carbon metabolism in cancer	KEGG PATHWAY	hsa05230	1	67	0.508167	0.763395	KIT	http://www.genome.jp/kegg-bin/show_pathway?hsa05230/hsa:3815%09red
Glycolysis / Gluconeogenesis	KEGG PATHWAY	hsa00010	1	67	0.508167	0.763395	PCK1	http://www.genome.jp/kegg-bin/show_pathway?hsa00010/hsa:5105%09red
Endocytosis	KEGG PATHWAY	hsa04144	3	260	0.517034	0.763395	KIT|CYTH4|GRK1	http://www.genome.jp/kegg-bin/show_pathway?hsa04144/hsa:3815%09red/hsa:6011%09red/hsa:27128%09red
Drug metabolism - cytochrome P450	KEGG PATHWAY	hsa00982	1	69	0.518526	0.763395	UGT1A7	http://www.genome.jp/kegg-bin/show_pathway?hsa00982/hsa:54577%09red
p53 signaling pathway	KEGG PATHWAY	hsa04115	1	69	0.518526	0.763395	CCNB3	http://www.genome.jp/kegg-bin/show_pathway?hsa04115/hsa:85417%09red
Bile secretion	KEGG PATHWAY	hsa04976	1	71	0.52867	0.763395	ABCG2	http://www.genome.jp/kegg-bin/show_pathway?hsa04976/hsa:9429%09red
Melanoma	KEGG PATHWAY	hsa05218	1	71	0.52867	0.763395	PDGFC	http://www.genome.jp/kegg-bin/show_pathway?hsa05218/hsa:56034%09red
PPAR signaling pathway	KEGG PATHWAY	hsa03320	1	72	0.533663	0.763395	PCK1	http://www.genome.jp/kegg-bin/show_pathway?hsa03320/hsa:5105%09red
Metabolism of xenobiotics by cytochrome P450	KEGG PATHWAY	hsa00980	1	73	0.538603	0.763395	UGT1A7	http://www.genome.jp/kegg-bin/show_pathway?hsa00980/hsa:54577%09red
Arrhythmogenic right ventricular cardiomyopathy (ARVC)	KEGG PATHWAY	hsa05412	1	74	0.543492	0.763395	ITGA10	http://www.genome.jp/kegg-bin/show_pathway?hsa05412/hsa:8515%09red
Pertussis	KEGG PATHWAY	hsa05133	1	75	0.54833	0.763395	C4A	http://www.genome.jp/kegg-bin/show_pathway?hsa05133/hsa:720%09red
Metabolic pathways	KEGG PATHWAY	hsa01100	13	1241	0.549802	0.763395	NDUFA7|PCK1|SDSL|GCNT4|CBS|ALOX5|PLCG2|CYP24A1|GGT5|UPB1|UGT1A7|ALOX12B|IDUA	http://www.genome.jp/kegg-bin/show_pathway?hsa01100/hsa:5336%09red/hsa:51301%09red/hsa:2687%09red/hsa:4701%09red/hsa:113675%09red/hsa:3425%09red/hsa:5105%09red/hsa:875%09red/hsa:242%09red/hsa:240%09red/hsa:51733%09red/hsa:1591%09red/hsa:54577%09red
Purine metabolism	KEGG PATHWAY	hsa00230	2	175	0.551852	0.763395	PDE4B|ENTPD8	http://www.genome.jp/kegg-bin/show_pathway?hsa00230/hsa:377841%09red/hsa:5142%09red
Calcium signaling pathway	KEGG PATHWAY	hsa04020	2	180	0.567279	0.771999	PLCG2|CACNA1A	http://www.genome.jp/kegg-bin/show_pathway?hsa04020/hsa:773%09red/hsa:5336%09red
Chemical carcinogenesis	KEGG PATHWAY	hsa05204	1	82	0.580806	0.771999	UGT1A7	http://www.genome.jp/kegg-bin/show_pathway?hsa05204/hsa:54577%09red
Peroxisome	KEGG PATHWAY	hsa04146	1	83	0.585253	0.771999	NUDT7	http://www.genome.jp/kegg-bin/show_pathway?hsa04146/hsa:283927%09red
Hypertrophic cardiomyopathy (HCM)	KEGG PATHWAY	hsa05410	1	83	0.585253	0.771999	ITGA10	http://www.genome.jp/kegg-bin/show_pathway?hsa05410/hsa:8515%09red
Herpes simplex infection	KEGG PATHWAY	hsa05168	2	186	0.585294	0.771999	HLA-DOB|HLA-DMA	http://www.genome.jp/kegg-bin/show_pathway?hsa05168/hsa:3112%09red/hsa:3108%09red
TGF-beta signaling pathway	KEGG PATHWAY	hsa04350	1	84	0.589654	0.771999	AMHR2	http://www.genome.jp/kegg-bin/show_pathway?hsa04350/hsa:269%09red
Salmonella infection	KEGG PATHWAY	hsa05132	1	86	0.598318	0.771999	CSF2	http://www.genome.jp/kegg-bin/show_pathway?hsa05132/hsa:1437%09red
ErbB signaling pathway	KEGG PATHWAY	hsa04012	1	88	0.606801	0.771999	PLCG2	http://www.genome.jp/kegg-bin/show_pathway?hsa04012/hsa:5336%09red
GABAergic synapse	KEGG PATHWAY	hsa04727	1	88	0.606801	0.771999	CACNA1A	http://www.genome.jp/kegg-bin/show_pathway?hsa04727/hsa:773%09red
Gap junction	KEGG PATHWAY	hsa04540	1	88	0.606801	0.771999	PDGFC	http://www.genome.jp/kegg-bin/show_pathway?hsa04540/hsa:56034%09red
Prostate cancer	KEGG PATHWAY	hsa05215	1	89	0.610977	0.771999	PDGFC	http://www.genome.jp/kegg-bin/show_pathway?hsa05215/hsa:56034%09red
Dilated cardiomyopathy	KEGG PATHWAY	hsa05414	1	90	0.615108	0.771999	ITGA10	http://www.genome.jp/kegg-bin/show_pathway?hsa05414/hsa:8515%09red
NF-kappa B signaling pathway	KEGG PATHWAY	hsa04064	1	93	0.627244	0.771999	PLCG2	http://www.genome.jp/kegg-bin/show_pathway?hsa04064/hsa:5336%09red
Epstein-Barr virus infection	KEGG PATHWAY	hsa05169	2	201	0.627934	0.771999	PLCG2|ENTPD8	http://www.genome.jp/kegg-bin/show_pathway?hsa05169/hsa:5336%09red/hsa:377841%09red
Proteoglycans in cancer	KEGG PATHWAY	hsa05205	2	205	0.638726	0.771999	WNT3A|PLCG2	http://www.genome.jp/kegg-bin/show_pathway?hsa05205/hsa:5336%09red/hsa:89780%09red
Inflammatory mediator regulation of TRP channels	KEGG PATHWAY	hsa04750	1	98	0.646638	0.771999	PLCG2	http://www.genome.jp/kegg-bin/show_pathway?hsa04750/hsa:5336%09red
Progesterone-mediated oocyte maturation	KEGG PATHWAY	hsa04914	1	98	0.646638	0.771999	CCNB3	http://www.genome.jp/kegg-bin/show_pathway?hsa04914/hsa:85417%09red
Amoebiasis	KEGG PATHWAY	hsa05146	1	100	0.654114	0.771999	CSF2	http://www.genome.jp/kegg-bin/show_pathway?hsa05146/hsa:1437%09red
Rap1 signaling pathway	KEGG PATHWAY	hsa04015	2	211	0.654461	0.771999	PDGFC|KIT	http://www.genome.jp/kegg-bin/show_pathway?hsa04015/hsa:3815%09red/hsa:56034%09red
AGE-RAGE signaling pathway in diabetic complications	KEGG PATHWAY	hsa04933	1	101	0.657793	0.771999	PLCG2	http://www.genome.jp/kegg-bin/show_pathway?hsa04933/hsa:5336%09red
Glucagon signaling pathway	KEGG PATHWAY	hsa04922	1	102	0.661433	0.771999	PCK1	http://www.genome.jp/kegg-bin/show_pathway?hsa04922/hsa:5105%09red
Regulation of actin cytoskeleton	KEGG PATHWAY	hsa04810	2	215	0.664651	0.771999	ITGA10|PDGFC	http://www.genome.jp/kegg-bin/show_pathway?hsa04810/hsa:8515%09red/hsa:56034%09red
HIF-1 signaling pathway	KEGG PATHWAY	hsa04066	1	103	0.665036	0.771999	PLCG2	http://www.genome.jp/kegg-bin/show_pathway?hsa04066/hsa:5336%09red
T cell receptor signaling pathway	KEGG PATHWAY	hsa04660	1	105	0.672127	0.774813	CSF2	http://www.genome.jp/kegg-bin/show_pathway?hsa04660/hsa:1437%09red
Insulin resistance	KEGG PATHWAY	hsa04931	1	109	0.685869	0.785201	PCK1	http://www.genome.jp/kegg-bin/show_pathway?hsa04931/hsa:5105%09red
Carbon metabolism	KEGG PATHWAY	hsa01200	1	113	0.699042	0.794801	SDSL	http://www.genome.jp/kegg-bin/show_pathway?hsa01200/hsa:113675%09red
Thyroid hormone signaling pathway	KEGG PATHWAY	hsa04919	1	118	0.714744	0.80529	PLCG2	http://www.genome.jp/kegg-bin/show_pathway?hsa04919/hsa:5336%09red
Neurotrophin signaling pathway	KEGG PATHWAY	hsa04722	1	120	0.720796	0.80529	PLCG2	http://www.genome.jp/kegg-bin/show_pathway?hsa04722/hsa:5336%09red
Platelet activation	KEGG PATHWAY	hsa04611	1	122	0.726722	0.80529	PLCG2	http://www.genome.jp/kegg-bin/show_pathway?hsa04611/hsa:5336%09red
AMPK signaling pathway	KEGG PATHWAY	hsa04152	1	124	0.732523	0.80529	PCK1	http://www.genome.jp/kegg-bin/show_pathway?hsa04152/hsa:5105%09red
Cell cycle	KEGG PATHWAY	hsa04110	1	124	0.732523	0.80529	CCNB3	http://www.genome.jp/kegg-bin/show_pathway?hsa04110/hsa:85417%09red
Oxidative phosphorylation	KEGG PATHWAY	hsa00190	1	133	0.757161	0.8269	NDUFA7	http://www.genome.jp/kegg-bin/show_pathway?hsa00190/hsa:4701%09red
Insulin signaling pathway	KEGG PATHWAY	hsa04910	1	139	0.772328	0.837407	PCK1	http://www.genome.jp/kegg-bin/show_pathway?hsa04910/hsa:5105%09red
Signaling pathways regulating pluripotency of stem cells	KEGG PATHWAY	hsa04550	1	142	0.779557	0.837407	WNT3A	http://www.genome.jp/kegg-bin/show_pathway?hsa04550/hsa:89780%09red
Wnt signaling pathway	KEGG PATHWAY	hsa04310	1	143	0.781916	0.837407	WNT3A	http://www.genome.jp/kegg-bin/show_pathway?hsa04310/hsa:89780%09red
Pathways in cancer	KEGG PATHWAY	hsa05200	3	397	0.794715	0.841774	WNT3A|PLCG2|KIT	http://www.genome.jp/kegg-bin/show_pathway?hsa05200/hsa:5336%09red/hsa:89780%09red/hsa:3815%09red
Non-alcoholic fatty liver disease (NAFLD)	KEGG PATHWAY	hsa04932	1	151	0.799914	0.841774	NDUFA7	http://www.genome.jp/kegg-bin/show_pathway?hsa04932/hsa:4701%09red
Hippo signaling pathway	KEGG PATHWAY	hsa04390	1	154	0.806278	0.841774	WNT3A	http://www.genome.jp/kegg-bin/show_pathway?hsa04390/hsa:89780%09red
mTOR signaling pathway	KEGG PATHWAY	hsa04150	1	154	0.806278	0.841774	WNT3A	http://www.genome.jp/kegg-bin/show_pathway?hsa04150/hsa:89780%09red
Oxytocin signaling pathway	KEGG PATHWAY	hsa04921	1	158	0.814454	0.844996	KCNJ4	http://www.genome.jp/kegg-bin/show_pathway?hsa04921/hsa:3761%09red
Alzheimer's disease	KEGG PATHWAY	hsa05010	1	168	0.833434	0.859317	NDUFA7	http://www.genome.jp/kegg-bin/show_pathway?hsa05010/hsa:4701%09red
Axon guidance	KEGG PATHWAY	hsa04360	1	176	0.847228	0.868147	PLCG2	http://www.genome.jp/kegg-bin/show_pathway?hsa04360/hsa:5336%09red
Chemokine signaling pathway	KEGG PATHWAY	hsa04062	1	187	0.864371	0.880279	GRK1	http://www.genome.jp/kegg-bin/show_pathway?hsa04062/hsa:6011%09red
Viral carcinogenesis	KEGG PATHWAY	hsa05203	1	205	0.88842	0.899254	HIST1H4J	http://www.genome.jp/kegg-bin/show_pathway?hsa05203/hsa:8363%09red
MAPK signaling pathway	KEGG PATHWAY	hsa04010	1	255	0.935294	0.940962	CACNA1A	http://www.genome.jp/kegg-bin/show_pathway?hsa04010/hsa:773%09red
Neuroactive ligand-receptor interaction	KEGG PATHWAY	hsa04080	1	278	0.949708	0.949708	GH1	http://www.genome.jp/kegg-bin/show_pathway?hsa04080/hsa:2688%09red
